# Supplementary material
Source: publisher figshare collection journal article supplement (https://acs.figshare.com/ndownloader/files/7849039)
Supplement: Supplementary file 1 [file 7849039]

Compound	SMILES	E. coli 208687 (MIC,mg/L)	E. coli 212648 (MIC,mg/L)	E. coli 209285 (MIC,mg/L)	E. coli Eco 106342 (MIC,mg/L)	E. coli 210737 (MIC,mg/L)	MDR K. pneumoniae 212423 (MIC,mg/L)	MDR K. pneumoniae 209632 (MIC,mg/L)	MDR K. pneumoniae 209735 (MIC,mg/L)	MDR K. pneumoniae 212232 (MIC,mg/L)	MDR K. pneumoniae 212229 (MIC,mg/L)	MDR A. baumannii 210278 (MIC,mg/L)	MDR A. baumannii 211606 (MIC,mg/L)	MDR A. baumannii 208995 (MIC,mg/L)	MDR A. baumannii 207200 (MIC,mg/L)	MDR A. baumannii 211137 (MIC,mg/L)	MDR P. aeruginosa 212886 (MIC,mg/L)	MDR P. aeruginosa 209471 (MIC,mg/L)	MDR P. aeruginosa 208247 (MIC,mg/L)	MDR P. aeruginosa 209321 (MIC,mg/L)	MDR P. aeruginosa 207272 (MIC,mg/L)
6(BAL30072)	NC1=NC(/C(C(N[C@@H]2C(N(OS(=O)(O)=O)C2(C)C)=O)=O)=N/OCC(N(O)C=C3O)=CC3=O)=CS1	0.25	1	0.25	0.5	0.25	64	>64	>64	0.25	>64	0.5	0.5	1	0.5	>64	1	2	1	2	4
aztronam	NC1=NC(/C(C(N[C@@H]2C(N(S(=O)(O)=O)[C@H]2C)=O)=O)=N/OC(C)(C)C(O)=O)=CS1	32	2	16	4	0.5	>64	>64	>64	>64	>64	64	64	>64	>64	>64	64	32	32	32	4
meropenem	O=C1[C@]([H])([C@@H](C)O)[C@]2([H])N1C(C(O)=O)=C(S[C@H]3C[C@@H](C(N(C)C)=O)NC3)[C@@H]2C	0.5	8	1	8	0.125	64	32	>64	>64	>64	64	64	64	64	64	64	32	64	64	32
ceftizoxime	O=C1[C@@H](NC(/C(C2=CSC(N)=N2)=N\OC)=O)[C@]3([H])N1C(C(O[Na])=O)=CCS3	2	1	2	1	0.5	64	32	64	>64	32	>64	>64	>64	>64	32	>64	>64	>64	>64	>64
8	NC1=NC(/C(C(N[C@@H]2C(N(OS(=O)(O)=O)C2(C)C)=O)=O)=N/OCCN(O)C(C)=O)=CS1	8	4	32	4	4	>64	>64	>64	32	>64	16	16	32	64	16	>64	64	64	>64	>64
9	NC1=NC(/C(C(N[C@@H]2C(N(OS(=O)(O)=O)C2(C)C)=O)=O)=N/OCC(C=CN3O)=CC3=O)=CS1	1	2	4	2	0.25	64	64	>64	4	64	4	8	8	4	64	64	64	64	64	64
10	NC1=NC(/C(C(N[C@@H]2C(N(OS(=O)(O)=O)C2(C)C)=O)=O)=N/OCCSC(N(C)N=C3O)=NC3=O)=CS1	2	2	8	2	1	64	64	64	16	64	16	16	32	16	64	64	64	64	16	32
11	NC1=NC(/C(C(N[C@@H]2C(N(OS(=O)(O)=O)C2(C)C)=O)=O)=N/OCCN3C=C(O)C(C=C3C)=O)=CS1	1	4	64	>64	1	64	64	64	8	64	8	8	16	8	64	64	64	64	64	64
12a	NC1=NC(/C(C(N[C@@H]2C(N(OS(=O)(O)=O)C2(C)C)=O)=O)=N/OC(C)C(N(O)C=C3O)=CC3=O)=CS1	0.06	0.06	0.25	0.06	0.06	64	64	64	0.03	64	0.5	0.5	1	0.5	64	0.5	1	0.25	1	8
12b	NC1=NC(/C(C(N[C@@H]2C(N(OS(=O)(O)=O)C2(C)C)=O)=O)=N/OC(CC)C(N(O)C=C3O)=CC3=O)=CS1	0.25	2	0.5	2	0.25	4	2	1	0.03	>64	1	1	2	1	0.25	0.5	0.5	0.125	1	4
12c	NC1=NC(/C(C(N[C@@H]2C(N(OS(=O)(O)=O)C2(C)C)=O)=O)=N/OC(C(C)C)C(N(O)C=C3O)=CC3=O)=CS1	<0.03	0.06	0.25	0.125	<0.03	0.25	0.5	0.5	<0.03	0.5	1	0.5	1	0.5	0.125	1	0.5	0.25	1	1
12d	NC1=NC(/C(C(N[C@@H]2C(N(OS(=O)(O)=O)C2(C)C)=O)=O)=N/OC(C3CC3)C(N(O)C=C4O)=CC4=O)=CS1	0.06	0.125	4	2	2	2	2	2	0.06	64	1	1	2	1	0.5	1	1	0.25	1	4
12e	NC1=NC(/C(C(N[C@@H]2C(N(OS(=O)(O)=O)C2(C)C)=O)=O)=N/OC(C=C)C(N(O)C=C3O)=CC3=O)=CS1	<0.03	<0.03	0.125	<0.03	0.06	16	>64	8	<0.03	>64	2	0.5	1	2	0.25	1	1	0.5	2	1
13a	NC1=NC(/C(C(N[C@@H]2C(N(OS(=O)(O)=O)C2(C)C)=O)=O)=N/OC(C3=CC=CC=C3)C(N(O)C=C4O)=CC4=O)=CS1	<0.03	<0.03	0.06	<0.03	0.06	4	8	8	<0.03	2	1	1	2	2	0.5	2	1	0.5	2	1
13b	NC1=NC(/C(C(N[C@@H]2C(N(OS(=O)(O)=O)C2(C)C)=O)=O)=N/OC(C3=CC=CS3)C(N(O)C=C4O)=CC4=O)=CS1	<0.03	0.125	0.25	0.06	0.25	16	8	8	0.06	8	1	1	2	1	0.5	2	1	0.5	2	2
13c	NC1=NC(/C(C(N[C@@H]2C(N(OS(=O)(O)=O)C2(C)C)=O)=O)=N/OC(C3=NC=CS3)C(N(O)C=C4O)=CC4=O)=CS1	<0.03	<0.03	0.125	<0.03	<0.03	1	4	2	<0.03	8	1	1	2	2	0.5	2	2	1	2	1
14a	NC1=NC(/C(C(N[C@@H]2C(N(OS(=O)(O)=O)C2(C)C)=O)=O)=N/OC(C(O)=O)C(N(O)C=C3O)=CC3=O)=CS1	0.5	0.125	1	1	4	1	1	1	0.25	1	0.5	0.5	0.5	0.5	0.5	2	4	1	2	4
14b	NC1=NC(/C(C(N[C@@H]2C(N(OS(=O)(O)=O)C2(C)C)=O)=O)=N/OC(C(OC)=O)C(N(O)C=C3O)=CC3=O)=CS1	0.25	1	1	0.25	0.25	2	2	2	0.25	2	1	0.5	1	1	1	1	2	1	1	4
14c	NC1=NC(/C(C(N[C@@H]2C(N(OS(=O)(O)=O)C2(C)C)=O)=O)=N/OC(C(NC)=O)C(N(O)C=C3O)=CC3=O)=CS1	0.06	0.125	0.5	1	4	2	2	2	0.25	2	0.5	0.25	1	0.5	1	4	4	4	4	4
15a	NC1=NC(/C(C(N[C@@H]2C(N(OS(=O)(O)=O)C2(C)C)=O)=O)=N/OC(CO)C(N(O)C=C3O)=CC3=O)=CS1	0.06	0.125	0.25	0.25	4	32	>64	8	0.25	>64	0.5	0.5	2	0.5	1	1	2	0.25	2	16
15b	NC1=NC(/C(C(N[C@@H]2C(N(OS(=O)(O)=O)C2(C)C)=O)=O)=N/OC(COC)C(N(O)C=C3O)=CC3=O)=CS1	<0.03	0.125	0.25	0.25	<0.03	2	2	2	0.06	2	0.5	0.125	1	0.25	1	1	4	1	2	4
15c	NC1=NC(/C(C(N[C@@H]2C(N(OS(=O)(O)=O)C2(C)C)=O)=O)=N/OC(COC(C)C)C(N(O)C=C3O)=CC3=O)=CS1	<0.03	0.25	0.25	0.125	0.06	64	>64	>64	0.25	>64	2	1	2	8	2	2	2	0.5	8	8
16a	NC1=NC(/C(C(N[C@@H]2C(N(OS(=O)(O)=O)C2(C)C)=O)=O)=N/OC(CSC)C(N(O)C=C3O)=CC3=O)=CS1	<0.03	0.125	0.25	0.03	<0.03	0.5	0.5	1	<0.03	1	0.5	0.5	1	0.5	0.125	0.5	0.5	0.125	1	1
16b	NC1=NC(/C(C(N[C@@H]2C(N(OS(=O)(O)=O)C2(C)C)=O)=O)=N/OC(CSC(C)C)C(N(O)C=C3O)=CC3=O)=CS1	<0.03	<0.03	0.125	<0.03	0.06	0.5	0.5	0.5	0.06	1	1	1	2	2	0.25	2	0.5	0.25	1	4
16c	NC1=NC(/C(C(N[C@@H]2C(N(OS(=O)(O)=O)C2(C)C)=O)=O)=N/OC(CS(=O)(C)=O)C(N(O)C=C3O)=CC3=O)=CS1	<0.03	0.25	0.25	2	0.06	1	1	0.5	0.06	2	2	2	2	2	0.25	4	8	1	8	32
17	NC1=NC(/C(C(N[C@@H]2C(N(OS(=O)(O)=O)C2(C)C)=O)=O)=N/OC(C)C(N(O)C=C3O)=CC3=O)=C(Cl)S1	0.06	0.25	0.25	0.25	<0.03	1	1	1	0.06	1	1	1	2	1	0.25	0.5	1	0.5	0.5	4
18	NC1=NC(/C(C(N[C@@H]2C(N(OS(=O)(O)=O)C2(C)C)=O)=O)=N/OC(C)C(N(O)C=C3O)=CC3=O)=NS1	0.125	0.5	1	0.5	<0.03	64	64	64	0.25	64	2	2	2	2	64	2	2	0.5	4	64
19	NC1=NC(/C(C(N[C@@H]2C(N(OS(=O)(O)=O)C2(C)C)=O)=O)=N/OC(C(C)C)C(N(O)C=C3O)=CC3=O)=C(Cl)S1	0.06	0.06	0.25	0.25	1	0.25	0.25	0.125	0.06	0.5	1	1	2	2	0.06	1	2	0.25	4	8
20	NC1=NC(/C(C(N[C@@H]2C(N(OS(=O)(O)=O)C2(C)C)=O)=O)=N/OC(C(C)C)C(N(O)C=C3O)=CC3=O)=NS1	0.125	0.06	1	2	1	1	1	1	0.06	1	4	2	4	4	0.5	1	4	0.5	2	32
21	NC1=NC(/C(C(N[C@@H]2C(N(OS(=O)(O)=O)C2(C)C)=O)=O)=N/O[C@@H](C(C)C)C(N(O)C=C3O)=CC3=O)=CS1	0.125	0.125	0.125	0.25	0.06	1	1	1	0.125	1	1	1	1	2	1	0.25	1	0.125	1	0.5
22	NC1=NC(/C(C(N[C@@H]2C(N(OS(=O)(O)=O)C2(C)C)=O)=O)=N/O[C@H](C(C)C)C(N(O)C=C3O)=CC3=O)=CS1	0.06	0.25	2	2	0.25	0.25	0.5	0.5	0.06	0.25	4	4	32	64	0.25	1	2	1	2	4
23	NC1=NC(/C(C(N[C@@H]2C(N(OS(=O)(O)=O)C2(C)C)=O)=O)=N/O[C@@H](C(C)C)C(N(O)C=C3O)=CC3=O)=C(Cl)S1	0.125	0.5	1	0.5	0.06	0.5	0.5	0.25	0.5	0.5	0.5	0.5	1	1	0.5	1	1	0.06	1	1
24	NC1=NC(/C(C(N[C@@H]2C(N(OS(=O)(O)=O)C2(C)C)=O)=O)=N/O[C@H](C(C)C)C(N(O)C=C3O)=CC3=O)=C(Cl)S1	0.25	0.5	1	1	0.125	2	1	1	0.5	1	>64	32	>64	64	0.25	1	2	0.5	4	2
25	NC1=NC(/C(C(N[C@@H]2C(N(OS(=O)(O)=O)C2(C)C)=O)=O)=N/O[C@@H](C(C)C)C(N(O)C=C3O)=CC3=O)=NS1	1	1	1	2	0.5	4	4	4	1	4	2	2	4	4	1	2	2	1	2	2
26	NC1=NC(/C(C(N[C@@H]2C(N(OS(=O)(O)=O)C2(C)C)=O)=O)=N/O[C@H](C(C)C)C(N(O)C=C3O)=CC3=O)=NS1	2	1	2	8	0.5	2	2	1	0.5	2	32	16	64	64	0.5	2	4	1	4	4
27	NC1=NC(/C(C(N[C@@H]2C(N(OS(=O)(O)=O)C2(C)C)=O)=O)=N/O[C@@H](CSC)C(N(O)C=C3O)=CC3=O)=CS1	<0.03	<0.03	0.25	<0.03	0.06	64	>64	>64	0.06	>64	1	0.5	1	1	4	1	1	0.5	1	2
28	NC1=NC(/C(C(N[C@@H]2C(N(OS(=O)(O)=O)C2(C)C)=O)=O)=N/O[C@H](CSC)C(N(O)C=C3O)=CC3=O)=CS1	<0.03	0.125	0.5	<0.03	0.06	0.5	0.5	0.5	0.125	0.5	2	1	2	2	0.5	4	2	1	8	4
